1 **Title:** Heat shock protein gene expression is higher and more variable with thermal  
2 stress and mutation accumulation in *Daphnia*

3

4 **Running title:** HSP expression increases with stress among *Daphnia*

5

6

7 **Authors:** Henry Scheffer, Jeremy Coate, Eddie K. H. Ho, and Sarah Schaack\*

8

9 **Institutional Affiliation:**

10 Department of Biology, Reed College, Portland, OR 97202

11

12 \*corresponding author

13

14

15

16

17

18 **\*Corresponding Author email:** [schaack@reed.edu](mailto:schaack@reed.edu)

19

20

21

22

23

24

25 **Abstract**

26 Understanding the genetic architecture of the stress response and its ability to evolve in  
27 response to different stressors requires an integrative approach. Here we quantify gene  
28 expression changes in response to two stressors associated with global climate change  
29 and habitat loss—heat shock and mutation accumulation. We measure expression  
30 levels for two Heat Shock Proteins (HSP90 and HSP60)—members of an important  
31 family of conserved molecular chaperones that have been shown to play numerous  
32 roles in the cell. While HSP90 assists with protein folding, stabilization, and degradation  
33 throughout the cell, HSP60 primarily localizes to the mitochondria and mediates *de*  
34 *novo* folding and stress-induced refolding of proteins. We perform these assays in  
35 *Daphnia magna* originally collected from multiple genotypes and populations along a  
36 latitudinal gradient, which differ in their annual mean, maximum, and range of  
37 temperatures. We find significant differences in overall expression between loci (10-  
38 fold), in response to thermal stress (~6x increase) and with mutation accumulation (~4x  
39 increase). Importantly, stressors interact synergistically to increase gene expression  
40 levels when more than one is applied (increasing, on average, >20x). While there is no  
41 evidence for differences among the three populations assayed, individual genotypes  
42 vary considerably in HSP90 expression. Overall, our results support previous proposals  
43 that HSP90 may act as an important buffer against not only heat, but also mutation, and  
44 expands this hypothesis to include another member of the gene family acting in a  
45 different domain of the cell.

46 **Keywords:** stress response, HSP60, HSP90, waterfleas, Cladocera

## 47 **Introduction**

48           Members of the heat shock protein (HSP) gene family perform an array of  
49 essential functions including: acting as molecular chaperones, facilitating the immune  
50 response, regulating apoptosis, and signaling protein degradation (Höhfeld et al., 2001;  
51 Queitsch et al., 2002; Czarnecka et al., 2006; Javid et al., 2007). The HSP family was  
52 first discovered (Ritossa, 1962) and described in *Drosophila melanogaster* (Tissières et  
53 al., 1974), but has since been the object of intense study across kingdoms and domains  
54 (Gupta 1995, Carra et al. 2017). Although HSPs have long been known to act as  
55 molecular chaperones aiding in both *de novo* folding and refolding of proteins (Feder &  
56 Hofmann, 1999), they also interact with proteins in numerous other contexts (e.g., to  
57 facilitate ligand binding or assembly of multiprotein complexes). Interestingly, HSP  
58 expression, and the general heat shock response (HSR), is mounted not only in  
59 response to heat, but also to a variety of other stressors (e.g., heavy metals, oxidative  
60 stress, cytotoxic agents, and mutation; Neuhaus-Steinmetz et al., 1997; Kim et al.,  
61 2014; Liu et al., 2015, Queitsch et al., 2002).

62           Here, we assess the influence of both thermal stress and mutation accumulation  
63 on expression levels of two heat shock proteins (Heat Shock Protein 90 (HSP90) and  
64 60 (HSP60)), as well as assessing variation among genotypes and populations in this  
65 response. HSP90 is a 90 kDa chaperonin, known as ‘central modulator’ or a ‘hub of  
66 hubs’ due to its role in signaling pathways and protein-protein interactions (Schopf et al.  
67 2017, Zabinsky et al., 2019b), that stabilizes a large clientele of intracellular proteins  
68 and signaling proteins. HSP60 is a 60 kDa chaperonin primarily localized to the  
69 mitochondria (Cheng et al., 1989). It is involved in the *de novo* folding and refolding of

70 imported proteins in the mitochondria (Martin et al., 1992). HSP60 has also been found  
71 in the cytosol where it can participate in either promoting or inhibiting apoptosis  
72 (Chandra et al., 2007).

73         Understanding how organisms respond to thermal stress is an area of urgent  
74 biological interest given the current projections of anthropogenically-induced climate  
75 change. Variation in HSP expression in response to thermal stress has been  
76 demonstrated in a variety of systems (e.g., Tomanek and Somero 2002, reviewed in  
77 Feder & Hofmann, 1999). Intraspecific variation in expression profiles within and among  
78 populations has not been as widely explored (but see review by Favatier et al. 1997).  
79 Among populations, genes thought to respond to heat have been examined in the  
80 genus *Fundulus* and individuals vary in their response depending on whether they  
81 originated from the Northern or Southern hemisphere, where water temperatures differ  
82 (Picard & Schulte, 2004). In addition, the activation of the HSR has been linked to the  
83 acclimation of an individual to a given thermal environment, which might explain  
84 differences between populations and individuals within a population (Buckley &  
85 Hofmann, 2002). While intraspecific variation is posited to be important for resilience to  
86 global climate change (Des Roches et al., 2018, 2020), long term thermal tolerance may  
87 be attributed to changes in gene expression rather than sequence differences in  
88 protein-coding regions (e.g., in corals; Palumbi et al., 2014) raising the question of how  
89 acclimation facilitates microevolutionary change (Pauwels et al., 2007, Gienapp et al.,  
90 2008).

91         The role of HSPs as buffers against mutation was initially proposed over 20  
92 years ago (Rutherford and Lindquist, 1998) and has been demonstrated in both animal

93 and plant systems (Queitsch et al., 2002). Because missense mutations can promote  
94 protein misfolding and HSPs aid in correct folding, HSP90 has gained a reputation as a  
95 “capacitor for mutation” by providing an additional barrier between genotype and  
96 phenotype (Jarosz & Lindquist, 2010). The idea is that buffering against protein  
97 misfolding stores variation that can then be ‘released’ if the cellular pool of HSP90  
98 becomes depleted (Jarosz et al., 2010), as has been demonstrated by mutant lines,  
99 knockouts/knockdowns of HSP90, pharmacological interference, and among natural  
100 populations that vary in their HSP90 expression (Rohner et al., 2013, Hummel et al.,  
101 2017, Mason et al., 2018). A mutation accumulation experiment with hypermutator  
102 strains of yeast revealed an enrichment of HSP90 expression (Zabinsky et al., 2019a),  
103 underscoring the need for a deeper understanding of the impact of mutation and of  
104 intraspecific variation in patterns of HSP expression. There is evidence that  
105 upregulation of the bacterial homolog to HSP60, GroEL, can buffer mutations in a  
106 similar capacity to HSP90 (Sabater-Muñoz et al., 2015), however it is still unknown if  
107 HSP60 buffers mutations in mitochondrial proteins.

108         We quantify HSP90 and HSP60 expression changes in response to heat shock  
109 and mutation accumulation (MA) among different genotypes and populations of *Daphnia*  
110 *magna*. *Daphnia* (Cladocera) have served as an ecological, evolutionary, and  
111 ecotoxicological model for well over a century (Schaack, 2008, Shaw et al., 2008,  
112 Yampolsky et al., 2014), and genomic resources are now available as well (e.g.,  
113 Colbourne et al., 2011, Orsini et al., 2016, and Lee et al., 2019). Previously, the  
114 *Daphnia* system has been used to demonstrate differences in gene expression, protein  
115 production, and evidence for microevolutionary change at HSP genes in the lab in

116 response to environmental change (Pauwels et al. 2007, Mikulski et al., 2009, 2011,  
117 Becker et al., 2018). We predict both heat shock and mutation accumulation will  
118 increase HSP expression for both genes if they both act as mutational capacitors, but  
119 also that the interaction of the two stressors might have a synergistic effect on  
120 expression levels, compared to one stress alone. Furthermore, we predicted baseline  
121 expression levels and/or the response to stress might differ among populations, but not  
122 among genotypes, given the regional differences between Finland, Germany, and  
123 Israel. Our experimental design allows us to measure HSP expression levels along  
124 multiple axes of comparison, and thus quantify responses to extrinsic and intrinsic  
125 stress (heat shock and mutation accumulation) as well as natural variation in basal and  
126 stress-induced HSP expression (e.g., among genotypes or populations). Assessing the  
127 levels of gene expression variation for HSPs along multiple treatment axes is an  
128 important first step towards elucidating the possible role of HSPs as cellular buffers or  
129 mutational capacitors and has implications for understanding the evolution of stress  
130 responses across lineages and over time.

131

## 132 **Materials and Methods**

### 133 Study System and Experimental Design

134 *Daphnia magna* are aquatic microcrustaceans (Order: Cladocera) with a cosmopolitan  
135 distribution that can reproduce quickly, with or without sex. The individuals used in this  
136 study were derived from genotypes originally collected in Finland, Germany, and Israel  
137 (provided by D. Ebert in 2014), from populations selected because of the distinctive  
138 environmental regimes they experience (including temperature, periods of dry down,  
139 and census population sizes; Lange et al. 2015) along a latitudinal gradient (see  
140 Supplemental Table S1a). In this experiment, we assayed one genotype from Finland  
141 (FC), one genotype from Germany (GA), and three genotypes from a single population  
142 in Israel (IA, IB, and IC; Figure 1). For the genotype from Germany (GC) and one of the  
143 genotypes from Israel (IA), both descendants of the originally collected genotypes  
144 (referred to as ‘control lines’ hereon) and descendants of five mutation accumulation  
145 (MA) lines initiated from each of these clones in 2013 (average number of generations  
146 of mutation accumulation = 24; see Ho et al. 2019 for MA details) were assayed (Table  
147 S1b). This design allowed us to assess gene expression differences between genes,  
148 with and without heat shock, among populations (Finland, Germany, and Israel), among  
149 genotypes within a population (within Israel), and between lineages with and without  
150 mutation accumulation (Figure 1). Individuals were reared concurrently for 15 days in  
151 June and July 2019 in Percival environmental chambers under strictly controlled  
152 laboratory conditions to assess levels of heat shock protein (HSP60 and HSP90)  
153 expression. Although we set up 4 biological replicates for each lineage/condition  
154 combination, in some cases individuals did not survive until the end of the experimental

155 period. In most cases, we were able to perform the RNA extractions and downstream  
156 molecular analyses on 2-3 biological replicates for each lineage/condition assayed.

157

### 158 Heat Shock Exposure

159 To assess the effect of heat on HSP gene expression, replicate fourth generation *D.*  
160 *magna* from the same clutch were raised in pairs in 40 mL of ADaM in 50 mL plastic  
161 conical tubes at 18 °C. Two pairs of individuals per line were raised for each treatment  
162 (heat shock and non-heat shock control). After 15 days of growth and regular feeding,  
163 each individual was transferred to a 1.7 mL microcentrifuge tube. For each line, half of  
164 the individuals were placed in a 30 °C Corning LSE Digital Dry Bath inside of an 18 °C  
165 Percival incubator (heat shock), and the other half were placed in a Corning LSE Digital  
166 Dry Bath that was turned off and equilibrated to ambient temperature inside of the same  
167 18 °C Percival incubator (no heat shock). Individuals were treated for 2 hours. After 2  
168 hours, the media was removed and replaced with 300 µL 1X DNA/RNA Shield from the  
169 Zymo Research Quick-RNA Miniprep Kit. Samples were frozen immediately in liquid  
170 nitrogen and stored at -20 °C.

171

### 172 RNA Extraction and Reverse Transcription

173 RNA was extracted from each sample independently using the Zymo Research Quick-  
174 RNA Miniprep kit according to the manufacturer's protocol. Briefly, one *D. magna*  
175 individual in 1X DNA/RNA Shield was mixed with 300 µL RNA Lysis Buffer and ground  
176 with a microcentrifuge pestle. All centrifugations were done at 10,000 × g for 30  
177 seconds unless specified with a Labnet Spectafuge 24D. After centrifugation through a



178 DNA specific filter for 1 min, the flow-through was mixed with 600  $\mu$ L ethanol,  
179 transferred to an RNA specific filter, and centrifuged. The bound RNA was then washed  
180 with 400  $\mu$ L of RNA Wash Buffer and treated with a solution of 75  $\mu$ L DNA Digestion  
181 Buffer and 5  $\mu$ L DNase I for 15 min in order to destroy any remaining DNA. The  
182 digestion was centrifuged, and the remaining RNA was washed once with 400  $\mu$ L RNA  
183 Prep Buffer and once with 700  $\mu$ L RNA Wash Buffer. The final wash was done with 400  
184  $\mu$ L RNA Wash Buffer, and it was centrifuged for 2 min in order to remove any latent  
185 buffer. RNA was then eluted into a nuclease-free microcentrifuge tube with 50  $\mu$ L  
186 DNase/RNase free water and stored at -20 °C. Concentration of RNA was measured  
187 using the Invitrogen Qubit RNA BR Assay with a Qubit 3.0 (Life Technologies). For each  
188 sample, 100 ng of total RNA per individual was reverse transcribed with random primers  
189 in a 20  $\mu$ L reaction using the Promega GoTaq 2-Step RT-qPCR System according to  
190 the manufacturer's protocol. cDNA was then stored at -20 °C.

191

## 192 Quantitative PCR

193 An RNA sequence for HSP60 was obtained from Steinberg et al. (2010) and the  
194 sequence for HSP90 from Kotov et al. (2006). Sequences were aligned to whole  
195 genome sequences of control lines from each population in this study using blastn (see  
196 Supplemental Data File A for alignments). Candidate control genes (succinate  
197 dehydrogenase, glyceraldehyde-3-phosphate dehydrogenase (GAPDH), and ubiquitin  
198 conjugating protein (UBC) for qPCR were selected from Heckmann et al. (2006).  
199 Primers were designed using Primer3 to generate amplicons between 70 bp and 200 bp  
200 (Supplemental Table S0). After qPCR, the stability of each control gene was checked

201 using RefFinder (Xie et al., 2012). Though UBC expression was previously observed to  
202 be somewhat responsive to heat in different *D. magna* populations (Jansen et al.,  
203 2017), we found it to be the most stable across treatments in our populations, so it was  
204 used as the control gene for this study. Primer efficiencies were assessed by serial  
205 dilution. Both target genes and UBC were found to have efficiencies of 100%  
206 (Supplemental Figure 1). Any primer pairs with estimated efficiencies slightly over 100%  
207 were assumed to have true efficiencies of 100%. Primer functionality and specificity  
208 were verified through end-point PCR using Qiagen Taq PCR Master Mix. Products were  
209 analyzed by gel electrophoresis. Amplicon lengths are as follows: HSP90 is 138 bp,  
210 HSP60 is 74 bp, and UBC is 90 bp.

211  
212 qPCR was performed using the Promega GoTaq 2-Step RT-qPCR System according to  
213 the manufacturer's protocol. Each 10  $\mu$ L reaction included 5  $\mu$ L GoTaq qPCR Master  
214 Mix, 2  $\mu$ L each of 1  $\mu$ M forward and reverse primers, and 1  $\mu$ L of cDNA. Cycling  
215 conditions (CFX Connect, Bio-Rad) were 2 min at 95 °C for polymerase activation  
216 followed by 40 cycles of 15 sec of denaturation at 95 °C with 1 min at 55 °C of annealing  
217 and extension. Lastly, a melt curve from 55 °C to 95 °C was added at the end to verify  
218 no off-target amplification. Samples and genes were organized through the sample  
219 maximization method such that each plate only amplified one gene, but each plate had  
220 all samples (2-3 biological replicates per line and treatment). Three technical replicate  
221 reactions were performed on separate plates. Because each sample was represented in  
222 every plate, plates served as technical replicates (Derveaux et al., 2010).

223

## 224 Data Analysis

225 In order to determine if any technical replicates were outliers, the mean of each sample  
226 x gene combination was calculated. Only replicates < 1 standard deviation from the  
227 mean ( $-1 < Z\text{-score} < 1$ ) were included in the analysis. The relative quantity (RQ) of  
228 experimental genes (HSP90, HSP60) originally present in the sample was calculated  
229 using the mean  $C_q$  of the remaining replicates and the efficiency of the primer pair (E),  
230 normalized by the RQ of the reference gene (UBC) as described by Rieu and Powers  
231 (2009) to estimate normalized relative quantities (NRQ). NRQ values were log  
232 transformed prior to statistical analysis to correct for heterogeneity of variance (Rieu  
233 and Powers, 2009). The raw data can be found in Tables S6 and Table S7 for HSP90  
234 and HSP60, respectively. Transformed data (using a  $\log_2(\text{NRQ})$  transformation) are in  
235 Table S8 and Table S9, for HSP90 and HSP60, respectively.

236

237 We tested our log-transformed dataset for normality and homogeneity of variances.  
238 Using the Levene's test, the data for HSP90 ( $F_{13,70} = 1.56$ ,  $p = 0.117$ ) and HSP60 ( $F_{13,70}$   
239  $= 1.08$ ,  $p = 0.388$ ) suggest that there is homogeneity of variances. Through a Shapiro-  
240 Wilks test on the residuals of a multiple linear regression model including all data for  
241 both genes independently, HSP60 did not depart significantly from normality ( $W =$   
242  $0.974$ ,  $p = 0.0877$ ) while HSP90 expression levels were found to have high non-  
243 normality ( $W = 0.811$ ,  $p < 0.0001$ ). As the data were already  $\log_2$  transformed, there  
244 was no further transformation that improved the normality of the dataset. Q-Q plots of  
245 expression levels of both genes show a higher than predicted number of cases at both  
246 ends of the model (Supplemental Figure 2). However, because there is no non-

247 parametric equivalent of a multi-way ANOVA, and ANOVA is robust to departures from  
248 normality (Knief and Forstmeier, 2020) such as those in this dataset, differences in  
249 means were tested using ANOVAs.

250 All ANOVAs were performed in RStudio. The full model tested the effects of gene  
251 (HSP60, HSP90), heat shock, mutation accumulation, population of origin, and  
252 genotype, and all interactions, on expression level using a 5-Way ANOVA (Model A in R  
253 code and Table S2). To test for mutation accumulation effects specific to HSP90 and  
254 HSP60, a model was made for each gene with all samples including both mutation  
255 accumulation lines and control lines with all populations using a 4-Way ANOVA (Models  
256 B and C respectively in R code and Tables S3 and S4). To test for population effects, in  
257 addition to Model A, two additional models, D and E, were made that included only  
258 control lines from each population (with all genotypes from Israel) for each gene using a  
259 2-Way ANOVA (Tables S3 and S4). Lastly, two 2-Way ANOVA models were made  
260 using only Israel control lines for each gene to test if genotype has an effect on HSP90  
261 or HSP60 expression (Models F and G in R code and Table S5). All models can be  
262 found in the supplemental tables and R code.

263

## 264 **Results**

265 Our assay of gene expression levels for HSP60 and HSP90 allowed us to test for the  
266 effect of heat stress (30°C vs. 18°C), mutation accumulation (5 MA lines compared to  
267 control lines from both Israel and Germany), population effects (Israel, German,  
268 Finland) and genotype effects (three genotypes nested within the Israel population) in  
269 *D. magna* (Figure 1). Overall, HSP90 was expressed approximately 10-fold higher than

270 HSP60 ( $F = 163.7$ ,  $df = 1$ ,  $p \ll 0.001$ ; Table 1, Table S2, and Figure 2). This difference  
271 in expression was observed under both unstressed and heat shocked conditions (Figure  
272 2).

273

274 Generally, heat shock increases the mean expression levels of both genes ( $F = 102.1$ ,  
275  $df = 1$ ,  $p < 0.001$ ; Table 1 and Figure 2), although the specific fold-change depends on  
276 the gene and population-of-origin (~6x increase, on average but in some cases as much  
277 as a 15x increase). Similarly, we observed higher expression levels for both genes in  
278 mutation accumulation lines relative to control lines ( $F = 15.7$ ,  $df = 1$ ,  $p < 0.0001$ ; Table  
279 1 and Figure 2), although the size of the increases were not as large as with heat shock  
280 (on average, 3.8x increase; Table 2). Individually, the effect of mutation accumulation  
281 was significant for HSP60 ( $F = 42.9$ ,  $df = 1$ ,  $p < 0.0001$ ; Table 1 and Table S4), but not  
282 for HSP90 ( $F = 0.8$ ,  $df = 1$ ,  $p = 0.381$ ; Table 1 and Table S3), though HSP90 expression  
283 levels were elevated in lines where mutations had accumulated, regardless of  
284 temperature (Table 2). There is evidence for a synergistic effect of heat and mutation  
285 accumulation, with much higher expression with the combination of both stresses (on  
286 average, 23x increase) than under either stress individually (Figure 2 and Table 2). Both  
287 factors, heat shock and mutation accumulation, tend to not only increase the mean  
288 expression levels, but also the variance in gene expression levels of both genes (Figure  
289 2).

290

291 In terms of intraspecific variation in gene expression, levels did not vary based on which  
292 population the genotypes originated from (Finland, Germany, and Israel;  $F = 1.26$ ,  $df =$

293 2,  $p = 0.29$ ; Table 1), although there was one interaction effect observed (population x  
294 gene x heat shock; Table 1). This was driven by the fact that there was an effect of heat  
295 shock in all three populations for HSP90, but only for two of the three populations for  
296 HSP60 (not Finland; see Table S2 for post-hoc pairwise contrasts). Surprisingly, there is  
297 a genotype effect for HSP90 expression levels (comparing genotypes IA, IB, and IC  
298 from Israel, excluding all MA lines;  $F = 6.4$ ,  $df = 2$ ,  $p = 0.01$ ; Tables 1 and 2 and Figure  
299 3), but no significant genotype effect was observed in HSP60 ( $F = 3.1$   $df = 2$ ,  $p = 0.08$ ;  
300 Table S5).

301

## 302 **Discussion**

303 The HSP genes are members of a large and diverse family and play a variety of  
304 important roles in responding to extrinsic and intrinsic sources of stress (Neuhaus-  
305 Steinmetz et al., 1997; Kim et al., 2014; Liu et al., 2015). Here, we performed a  
306 controlled laboratory experiment to compare the expression profiles of HSP90 and  
307 HSP60 with and without heat stress and mutation accumulation, and compare  
308 expression levels and changes among populations and genotypes collected along a  
309 latitudinal gradient. While HSP90 has long been referred to as a mutational “capacitor”  
310 because of its major role in protein folding and the large number of proteins it interacts  
311 with (Schopf et al., 2017), the role of HSP60 in the stress response is less well  
312 understood given its localization primarily to the mitochondria (Magnoni et al., 2014).  
313 Recent studies have reported the highest direct estimates of spontaneous mutation  
314 rates in animals from mutation accumulation experiments with *D. magna* (Ho et al.,  
315 2019, Ho et al., 2020). Their importance as an ecological and environmental model

316 system make an understanding of their stress response and their ability to buffer the  
317 phenotypic effects of mutation of particular interest (Latta et al. 2015).

318 Overall, we find that HSP90 is expressed ~10x more than HSP60 in *D. magna*  
319 (Table 1 and Figure 2). This corroborates previous work that shows HSP90 constitutes  
320 approximately 1-2% of the total protein content of eukaryotic cells (Borkovich et al.,  
321 1989) and, in yeast, is known to interact with up to 20% of proteins (Taipale et al.,  
322 2010). As expected, we found both genes have a robust heat shock response in terms  
323 of HSP 90 and HSP60 expression increases (Table 1 and Figure 2). Heat shock  
324 destabilizes folded proteins, and elevated HSP expression protect against exposure of  
325 hydrophobic segments, aggregation, and misfolding (Kimura et al., 1993, Vabulas et al.,  
326 2010). It is known that HSP60 is upregulated in response to heat (Martin et al., 1992)  
327 and oxidative stress in *D. melanogaster* (Singh et al., 2009), but a multi-faceted, rapid  
328 HSR may be especially important for aquatic animals living in shallow water because  
329 they can experience major temperature fluctuations (Feder and Hoffman, 1999). We  
330 also observed an increase in gene expression in mutation accumulation lines relative to  
331 controls, especially in HSP60 (Table 1). That this response is especially acute in HSP60  
332 may be related to the higher mutation rates observed in the mtDNA genome, relative to  
333 the nuclear genome, in animals (although mtDNA mutation rates are notoriously difficult  
334 to accurately measure [Schaack et al., 2020]). The greater upregulation of HSP60 in  
335 response to mutation accumulation underscores the importance of examining the  
336 potential of other HSPs (in addition to HSP90) as potential mutational capacitors  
337 (Rutherford and Lindquist, 1998).

338           In addition to looking at the effects of heat shock and mutation, we were also  
339 interested in differences within and among populations in both their baseline levels of  
340 expression and their response to stress. Surprisingly, there are no significant  
341 differences in gene expression at either locus among populations (Table 1), despite the  
342 major abiotic differences between these locales in mean annual temperatures  
343 (approximately 2, 10, and 21 degrees C in Finland, Germany, and Israel, respectively;  
344 Rohde and Hausfather 2020). It could be that the evolution of HSRs depend more on  
345 maximum temperatures or temperature fluctuations, which exhibit a much smaller range  
346 of only ~10 and 7 degrees, respectively (Table S1; Hofmann and Somero, 1996;  
347 Gehring and Wehner; 1995; Cambroner et al., 2018). However, given that the  
348 genotypes used in this study have extremely high identity in the coding regions of these  
349 loci (>99% of sites are identical [418/422] for HSP60 and 735/741 for HSP90;  
350 Supplemental Data Files), differences in gene expression are more likely due to  
351 variation at promoter regions or other loci in the genome which may serve to regulate  
352 HSP expression. While our predictions about population differences did not bear out,  
353 there is a difference in expression among genotypes within a population (IA, IB, and IC  
354 genotypes from Israel) for HSP90 and a non-significant trend for HSP60. Interestingly,  
355 the genotype with the highest levels of heat-induced gene expression (Figure 3) is also  
356 the genotype with the highest mtDNA base substitution mutation rate among those from  
357 Israel (Ho et al. 2020), further supporting the notion that HSP expression could provide  
358 a buffer against high mutation rates.

359           Our study provides strong evidence for the synergistic effects of multiple stresses  
360 on HSP expression. In all cases where a given genotype was assayed with and without



361 heat shock and mutation accumulation, the combination of the two stressors resulted in  
362 an increase in the expression levels that was an order of magnitude greater than the  
363 increase observed when only one stress is applied (Table 2). Furthermore, the variance  
364 was greater in the cases where two stressors were applied (Figure 2). This has  
365 important implications for *Daphnia*, and other species, as global climate change does  
366 not only lead to different mean and maximum temperatures and temperature  
367 fluctuations. Changing climate can alter exposure to UV or other atmospheric  
368 mutagens, and can also reduce the availability of freshwater aquatic habitats caused by  
369 drought or sea level rise. Reduced habitat availability will likely reduce effective  
370 population sizes for species like *D. magna*, and thus a further increase in their already  
371 high mutation rates (reviewed in Lynch et al. 2016; Ho et al., 2020). If HSPs can buffer  
372 against not only thermal stress but the accumulation of mutations, they could enable the  
373 evolution of higher mutation rates. While spontaneous mutations are known, to be, on  
374 average deleterious, beneficial mutations do occur. Ultimately, increases in genetic  
375 variation provide the evolutionary escape hatch or opportunity for rapid adaptation  
376 (Swings et al., 2017) necessary to tolerate or thrive in increasingly stressful  
377 environments.

378

379  
380  
381

## Figures and Tables

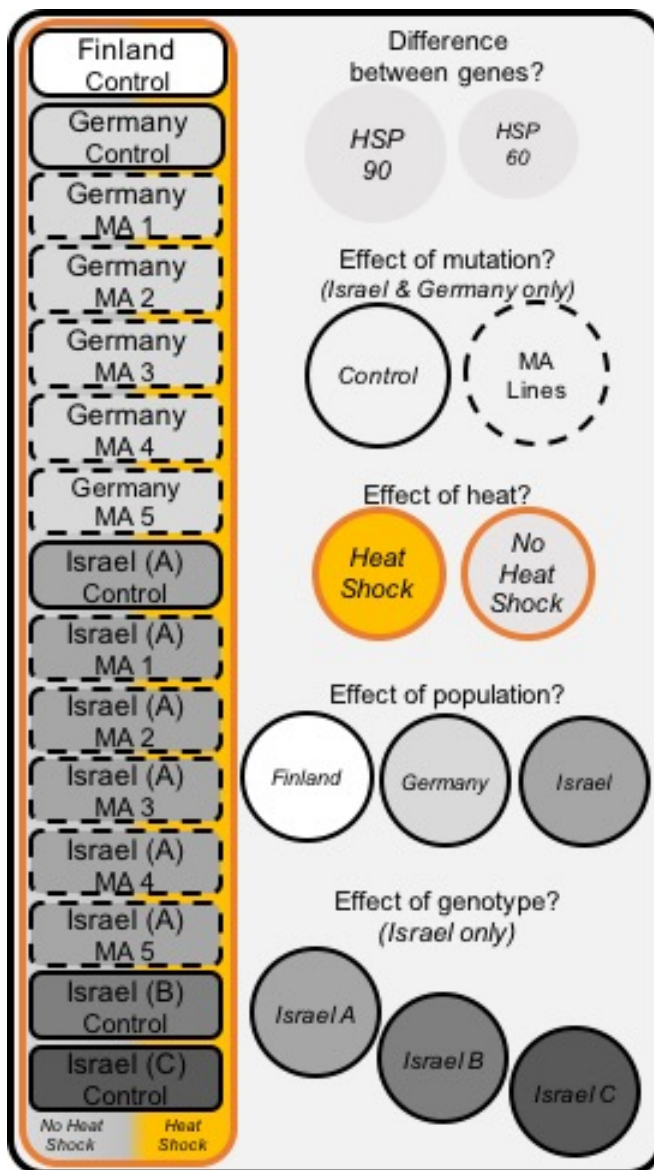

382  
383  
384  
385  
386  
387  
388  
389  
390  
391  
392

**Figure 1.** Experimental design showing all 15 genotypes assayed (rectangles on left) in triplicate to quantify HSP60 and HSP90 expression levels. Genotypes include descendants of original isolates from Finland, Germany, and three genotypes from Israel (solid border) and individuals from mutation accumulation lines derived from two of these genotypes (dashed borders). Assays were performed on individuals raised in a common laboratory environment exposed to one of two environmental conditions (no heat shock [No HS; gray background] or heat shock [HS; yellow background]). The five axes of comparison made possible using this design are summarized in the circles on the right.

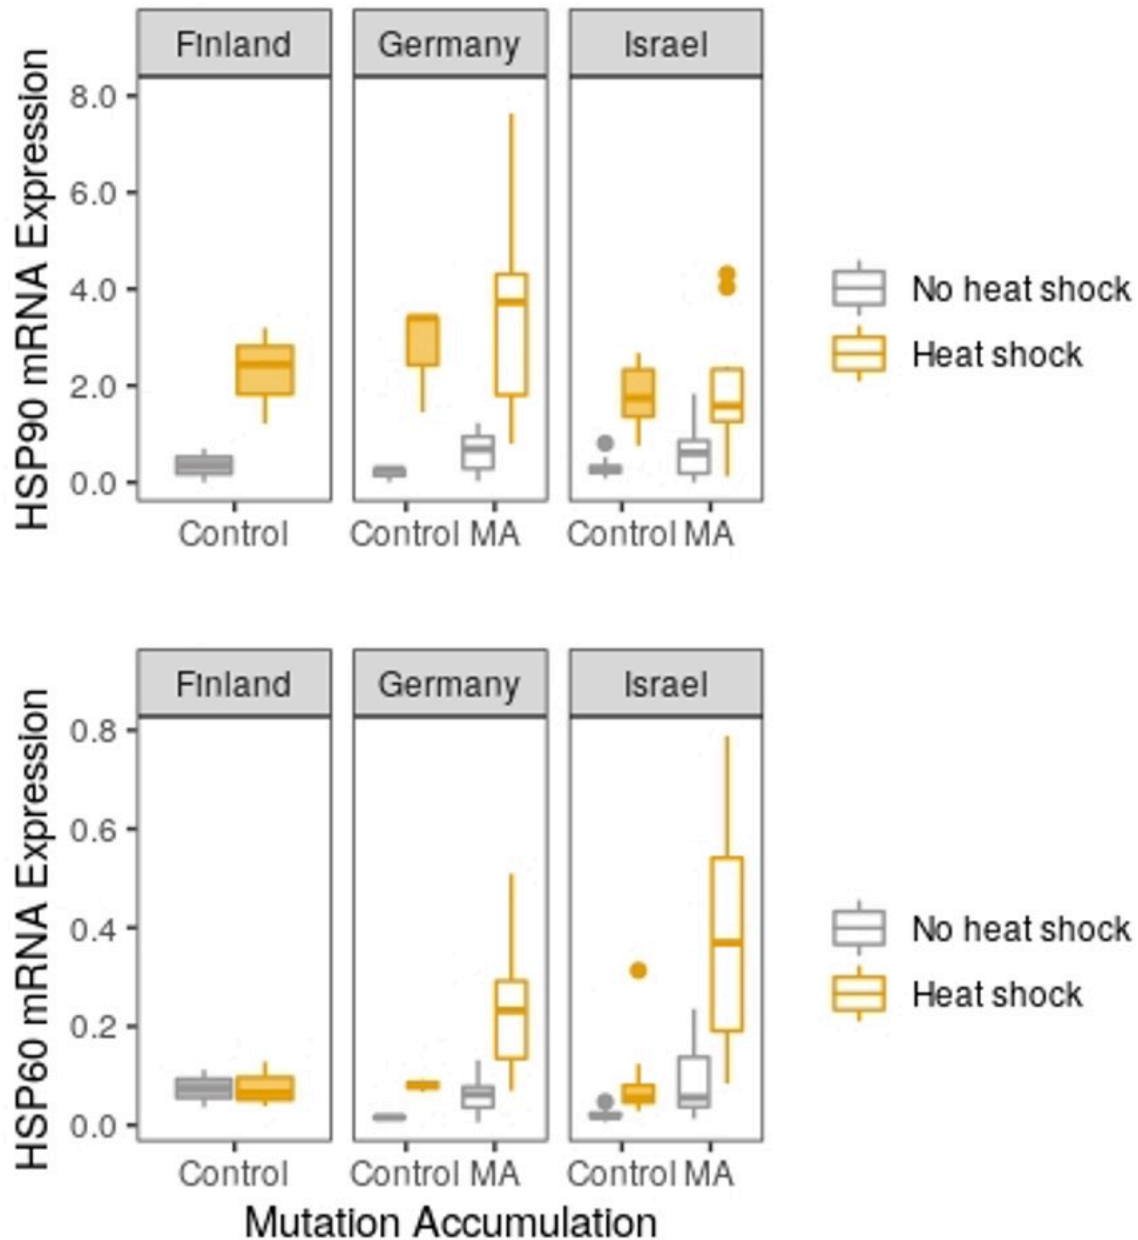

393  
394 **Figure 2.** Gene expression for HSP90 (top) and HSP60 (bottom) in genotypes from three  
395 populations (Finland, Germany, and Israel) from individuals from mutation accumulation  
396 (unshaded) versus control lines (shaded) that were (yellow) and were not heat shocked (gray).  
397 Horizontal lines represent medians, boxes indicate quartiles and vertical lines illustrate the  
398 maximum value of  $1.5 \times \text{IQR} + \text{the 75th percentile}$  and the minimum value of the 25th percentile  
399 -  $1.5 \times \text{IQR}$  of the variance. Note: One outlier in Germany MA (HSP90 mRNA Expression =  
400 12.64) was excluded from the graph of HSP90 expression to better visualize differences in  
401 medians; however, it is included in the ANOVA results in Table 1.

402

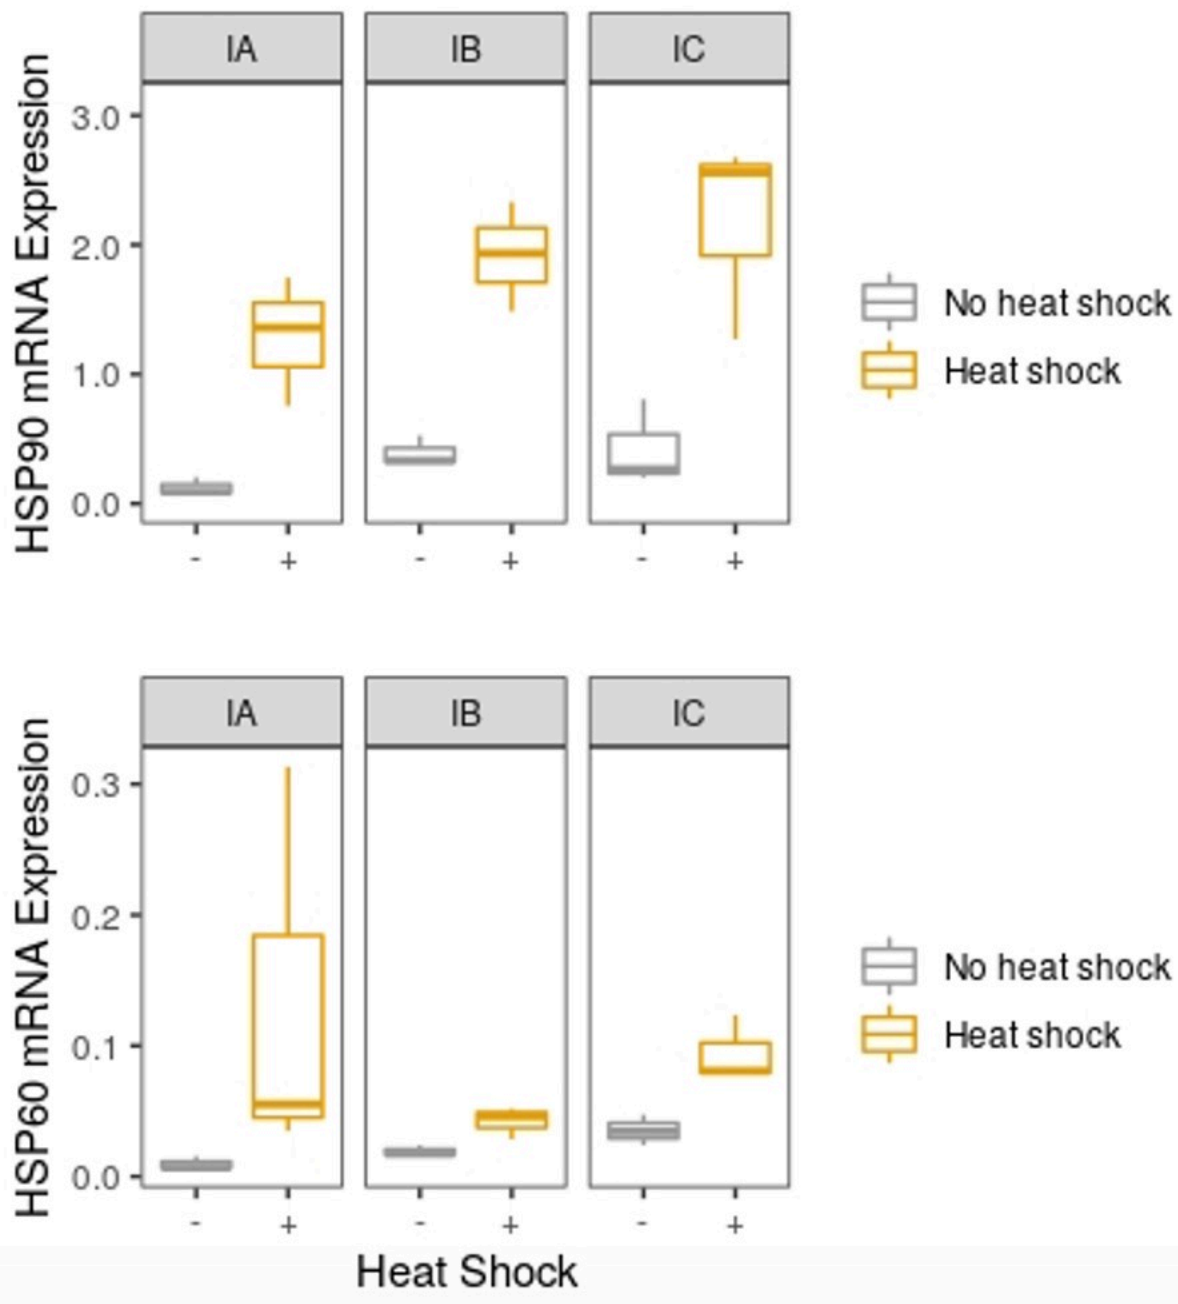

403

404

405

406

407

408

409

410

**Figure 3.** Gene expression levels for HSP90 (top) and HSP60 (bottom) with exposure to heat shock (yellow) and without heat shock (gray) for three genotypes from Israel (data for ANOVAs appears in Table S5). Horizontal lines represent medians, boxes indicate quartiles and vertical lines illustrate the maximum value of  $1.5 \times \text{IQR} + \text{75th percentile}$  and the minimum value of  $\text{25th percentile} - 1.5 \times \text{IQR}$  of the variance.

411 **Table 1.** Analysis of variance (ANOVA) for gene expression based on transcript abundance for  
 412 HSP60 and HSP90 assayed in *Daphnia magna* originally collected from three populations (in  
 413 Finland, Germany, and Israel), subject to mutation accumulation, and raised with and without  
 414 heat shock. For complete ANOVA tables of all data partitions, see Supplemental Tables S2-S5;  
 415 for the raw data used in this analysis, see Supplemental Tables S6 and S7.

| Data partitions                              | Factor                           | Df | Sum of Squares | F value  | Pr(>F)             |
|----------------------------------------------|----------------------------------|----|----------------|----------|--------------------|
| <i>All data</i>                              |                                  |    |                |          |                    |
| <i>Main effects and 2/3-way interactions</i> | Population                       | 2  | 6.63           | 1.2611   | 0.2866             |
|                                              | <b>Gene</b>                      | 1  | 430.19         | 163.7158 | <b>&lt; 0.0001</b> |
|                                              | <b>HeatShock</b>                 | 1  | 268.22         | 102.0753 | <b>&lt; 0.0001</b> |
|                                              | <b>MutationAccumulation</b>      | 1  | 41.24          | 15.6935  | <b>0.0001</b>      |
|                                              | Population:Gene                  | 2  | 7.83           | 1.4898   | 0.2290             |
|                                              | Population:HeatShock             | 2  | 3.63           | 0.6902   | 0.5032             |
|                                              | Gene:HeatShock                   | 1  | 7.65           | 2.9106   | 0.0902             |
|                                              | Population:MutationAccumulation  | 1  | 1.73           | 0.6589   | 0.4183             |
|                                              | <b>Gene:MutationAccumulation</b> | 1  | 15.4           | 5.8607   | <b>0.0168</b>      |
|                                              | HeatShock:MutationAccumulation   | 1  | 1.37           | 0.5202   | 0.4720             |
|                                              | Population:Genotype              | 2  | 7.37           | 1.4027   | 0.2494             |
|                                              | <b>Population:Gene:HeatShock</b> | 2  | 20.11          | 3.827    | <b>0.0241</b>      |
| <i>HSP 60 only</i>                           |                                  |    |                |          |                    |
| <i>Main effects</i>                          | Population                       | 2  | 0.819          | 0.3281   | 0.7214             |
|                                              | <b>HeatShock</b>                 | 1  | 92.641         | 74.2147  | <b>&lt; 0.0001</b> |
|                                              | <b>MutationAccumulation</b>      | 1  | 53.518         | 42.8737  | <b>&lt; 0.0001</b> |
| <i>HSP 90 only</i>                           |                                  |    |                |          |                    |
| <i>Main effects</i>                          | Population                       | 2  | 13.637         | 1.7017   | 0.1898             |
|                                              | <b>HeatShock</b>                 | 1  | 183.224        | 45.726   | <b>&lt; 0.0001</b> |
|                                              | MutationAccumulation             | 1  | 3.118          | 0.7782   | 0.3807             |
| <i>HSP 60 only, Israel only</i>              |                                  |    |                |          |                    |
| <i>Genotype Effects</i>                      | Genotype                         | 2  | 4.0676         | 3.0971   | 0.0823             |
|                                              | <b>HeatShock</b>                 | 1  | 16.6449        | 25.3471  | <b>0.0003</b>      |
|                                              | Genotype:HeatShock               | 2  | 3.9055         | 2.9737   | 0.0893             |
| <i>HSP 90 only, Israel only</i>              |                                  |    |                |          |                    |
| <i>Genotype Effects</i>                      | <b>Genotype</b>                  | 2  | 5.729          | 6.3804   | <b>0.0130</b>      |
|                                              | <b>HeatShock</b>                 | 1  | 34.261         | 76.3196  | <b>&lt; 0.0001</b> |
|                                              | Genotype:HeatShock               | 2  | 1.048          | 1.1673   | 0.3442             |

416

417 **Table 2.** Estimated mean expression levels for HSP60 and HSP90 assayed in *Daphnia magna*  
 418 originally collected from three locations (Finland, Germany, and Israel), subject to mutation  
 419 accumulation, and raised with and without heat shock. For Germany and Finland, one genotype  
 420 each was sampled (GC and FC, respectively). For Israel, three individual genotypes were  
 421 assayed (IA, IB, and IC). For complete ANOVA tables of all data partitions, see Supplemental  
 422 Tables S2-S5; for the data used in this analysis, see Supplemental Tables S6 and S7.

| Gene  | Population | Genotype   | Mutation Accumulation | Heat Shock | Mean Expression (NRQ) Untransformed |
|-------|------------|------------|-----------------------|------------|-------------------------------------|
| HSP90 | Finland    | FC         | No                    | -          | 0.350                               |
|       |            | FC         | No                    | +          | 2.282                               |
|       | Germany    | GC         | No                    | -          | 0.181                               |
|       |            | GC         | No                    | +          | 2.754                               |
|       |            | GC         | Yes                   | -          | 0.674                               |
|       |            | GC         | Yes                   | +          | 4.267                               |
|       | Israel     | IA, IB, IC | No                    | -          | 0.314                               |
|       |            | IA, IB, IC | No                    | +          | 1.791                               |
|       |            | IA         | Yes                   | -          | 0.636                               |
|       |            | IA         | Yes                   | +          | 1.818                               |
|       |            | IA         | No                    | -          | 0.124                               |
|       |            | IA         | No                    | +          | 1.287                               |
|       |            | IB         | No                    | -          | 0.392                               |
|       |            | IB         | No                    | +          | 1.917                               |
| IC    |            | No         | -                     | 0.425      |                                     |
| IC    |            | No         | +                     | 2.169      |                                     |
| HSP60 | Finland    | FC         | No                    | -          | 0.074                               |
|       |            | FC         | No                    | +          | 0.077                               |
|       | Germany    | GC         | No                    | -          | 0.015                               |
|       |            | GC         | No                    | +          | 0.080                               |
|       |            | GC         | Yes                   | -          | 0.059                               |
|       |            | GC         | Yes                   | +          | 0.245                               |
|       | Israel     | IA, IB, IC | No                    | -          | 0.021                               |
|       |            | IA, IB, IC | No                    | +          | 0.090                               |
|       |            | IA         | Yes                   | -          | 0.090                               |
|       |            | IA         | Yes                   | +          | 0.384                               |
|       |            | IA         | No                    | -          | 0.010                               |
|       |            | IA         | No                    | +          | 0.135                               |
|       |            | IB         | No                    | -          | 0.019                               |
|       |            | IB         | No                    | +          | 0.042                               |
| IC    |            | No         | -                     | 0.035      |                                     |
| IC    |            | No         | +                     | 0.094      |                                     |

423

424

425 **Acknowledgements**

426

427 We would like to thank Theresa Steele and Aziz Ouedraogo for their invaluable  
428 assistance during the assay. We would like to thank Dieter Ebert for supplying the  
429 animals used to initiate the mutation accumulation experiment. We thank Kelly  
430 McConville for her statistical advice. We would also like to acknowledge our funding  
431 sources: awards from Reed College to HS and from National Institute of General  
432 Medical Sciences of the National Institutes of Health (GM132861) and National Science  
433 Foundation (MCB-1150213) to SS.

434

435 **References**

436

- 437 1. Becker D, Reydelet Y, Lopez J A, et al. (2018). The transcriptomic and proteomic  
438 responses of *Daphnia pulex* to changes in temperature and food supply comprise  
439 environment-specific and clone-specific elements. *BMC Genomics* 19: 376.  
440 <https://doi.org/10.1186/s12864-018-4742-6>.
- 441 2. Borkovich KA, Farrelly FW, Finkelstein DB, et al. (1989) HSP82 is an essential  
442 protein that is required in higher concentrations for growth of cells at higher  
443 temperatures. *Mol Cell Biol* 9:3919–3930. <https://doi.org/10.1128/mcb.9.9.3919>
- 444 3. Buckley BA, Hofmann GE (2002) Thermal acclimation changes DNA-binding  
445 activity of heat shock factor 1 (HSF1) in the goby *Gillichthys mirabilis*:  
446 implications for plasticity in the heat-shock response in natural populations.  
447 *Journal of Experimental Biology* 205:3231–3240
- 448 4. Cambroner M C, Beasley J, Kissane S, Orsini L (2018) Evolution of thermal  
449 tolerance in multifarious environments. *Molecular Ecology* 27:4529–41.  
450 <https://doi.org/10.1111/mec.14890>.
- 451 5. Carra S, Alberti S, Arrigo PA, et al. (2017) The growing world of small heat shock  
452 proteins: from structure to functions. *Cell Stress and Chaperones* 22(4):601-11.  
453 <https://doi.org/10.1007/s12192-017-0787-8>
- 454 6. Chandra D, Choy G, Tang DG (2007) Cytosolic Accumulation of HSP60 during  
455 Apoptosis with or without Apparent Mitochondrial Release. *J Biol Chem*  
456 282:31289–31301. <https://doi.org/10.1074/jbc.M702777200>

- 457 7. Cheng MY, Hartl FU, Martin J, et al. (1989) Mitochondrial heat-shock protein  
458 HSP60 is essential for assembly of proteins imported into yeast mitochondria.  
459 Nature 337:620–625. <https://doi.org/10.1038/337620a0>
- 460 8. Colbourne JK, Pfrender ME, Gilbert D, et al. (2011) The ecoresponsive genome  
461 of *Daphnia pulex*. Science 331:555–561.  
462 <https://doi.org/10.1126/science.1197761>
- 463 9. Czarnecka AM, Campanella C, Zummo G, Cappello F (2006) Mitochondrial  
464 chaperones in cancer: from molecular biology to clinical diagnostics. Cancer  
465 Biology & Therapy 5:714–720. <https://doi.org/10.4161/cbt.5.7.2975>
- 466 10. Derveaux S, Vandesompele J, Hellemans J (2010) How to do successful gene  
467 expression analysis using real-time PCR. Methods 50:227–230.  
468 <https://doi.org/10.1016/j.ymeth.2009.11.001>
- 469 11. Des Roches S, Post M, Turley N, et al. (2018) The ecological importance of  
470 intraspecific variation. Nature Ecology & Evolution 2: 57–64.  
471 <https://doi.org/10.1038/s41559-017-0402-5>.
- 472 12. Des Roches S, Bell MA, Palkovacs EP (2020) Climate-driven habitat change  
473 causes evolution in Threespine Stickleback. Global Change Biology.  
474 Feb;26(2):597-606.
- 475 13. Favatier F, Bornman L, Hightower LE, et al. (1997) Variation in hsp gene  
476 expression and Hsp polymorphism: do they contribute to differential disease  
477 susceptibility and stress tolerance? Cell stress & chaperones 2(3):141.
- 478 14. Feder ME, Hofmann GE (1999) Heat-shock proteins, molecular chaperones,  
479 and the stress response: evolutionary and ecological physiology. Annual Review  
480 of Physiology 61:243–282. <https://doi.org/10.1146/annurev.physiol.61.1.243>
- 481 15. Gehring WJ, Wehner R (1995) Heat shock protein synthesis and  
482 thermotolerance in *Cataglyphis*, an ant from the Sahara desert. Proc Natl Acad  
483 Sci USA 92:2994–2998. <https://doi.org/10.1073/pnas.92.7.2994>
- 484 16. Gienapp P, Teplitsky C, Alho JS, et al. (2008) Climate change and evolution:  
485 disentangling environmental and genetic responses. Molecular Ecology 17:167–  
486 178. <https://doi.org/10.1111/j.1365-294X.2007.03413.x>
- 487 17. Gupta RS. (1995) Phylogenetic analysis of the 90 kD heat shock family of  
488 protein sequences and an examination of the relationship among animals,  
489 plants, and fungi species. Molecular Biology and Evolution 12(6):1063-73.  
490 <https://doi.org/10.1093/oxfordjournals.molbev.a040281>



- 491 18. Heckmann L-H, Connon R, Hutchinson TH, et al. (2006) Expression of target  
492 and reference genes in *Daphnia magna* exposed to ibuprofen. BMC Genomics  
493 7:175. <https://doi.org/10.1186/1471-2164-7-175>
- 494 19. Herrmann M, Ravindran SP, Schwenk K, Cordellier M (2018) Population  
495 transcriptomics in *Daphnia*: the role of thermal selection. Molecular Ecology 27:  
496 387–402. <https://doi.org/10.1111/mec.14450>.
- 497 20. Ho EKH, Macrae F, Latta LC, et al. (2019) intraspecific variation in microsatellite  
498 mutation profiles in *Daphnia magna*. Mol Biol Evol 36:1942–1954.  
499 <https://doi.org/10.1093/molbev/msz118>
- 500 21. Ho EKH, Macrae F, Latta LC, et al. (2020) High and highly variable spontaneous  
501 mutation rates in *Daphnia*. Mol Biol Evol. 37:3258-3266.  
502 <https://doi.org/10.1093/molbev/msaa142>
- 503 22. Hofmann GE, Somero GN (1996) Interspecific variation in thermal denaturation  
504 of proteins in the congeneric mussels *Mytilus trossulus* and *M. galloprovincialis*:  
505 evidence from the heat-shock response and protein ubiquitination. Mar Biol  
506 126:65–75. <https://doi.org/10.1007/BF00571378>
- 507 23. Höhfeld J, Cyr DM, Patterson C (2001) From the cradle to the grave: molecular  
508 chaperones that may choose between folding and degradation. EMBO Rep  
509 2:885–890. <https://doi.org/10.1093/embo-reports/>
- 510 24. Hummel B, Hansen EC, Yoveva A, et al. (2017) The evolutionary capacitor  
511 HSP90 buffers the regulatory effects of mammalian endogenous retroviruses.  
512 Nature Structural & Molecular Biology 24:234–242.  
513 <https://doi.org/10.1038/nsmb.3368>
- 514 25. Jansen M, Geerts A N, Rago A, et al. (2017) Thermal tolerance in the keystone  
515 species *Daphnia Magna*—a candidate gene and an outlier analysis approach.  
516 Molecular Ecology 26: 2291–2305. <https://doi.org/10.1111/mec.14040>.
- 517 26. Jarosz DF, Lindquist S (2010) HSP90 and environmental stress transform the  
518 adaptive value of natural genetic variation. Science 330:1820–1824.  
519 <https://doi.org/10.1126/science.1195487>
- 520 27. Jarosz DF, Taipale M, Lindquist S (2010) Protein homeostasis and the  
521 phenotypic manifestation of genetic diversity: principles and mechanisms.  
522 Annual Review of Genetics 44:189–216.  
523 <https://doi.org/10.1146/annurev.genet.40.110405.090412>

- 524 28. Javid B, MacAry PA, Lehner PJ (2007) Structure and function: heat shock  
525 proteins and adaptive immunity. *The Journal of Immunology* 179:2035–2040.  
526 <https://doi.org/10.4049/jimmunol.179.4.2035>
- 527 29. Kim B-M, Rhee J-S, Jeong C-B, et al. (2014) Heavy metals induce oxidative  
528 stress and trigger oxidative stress-mediated heat shock protein (HSP)  
529 modulation in the intertidal copepod *Tigriopus japonicus*. *Comparative*  
530 *Biochemistry and Physiology Part C: Toxicology & Pharmacology* 166:65–74.  
531 <https://doi.org/10.1016/j.cbpc.2014.07.005>
- 532 30. Kimura E, Enns RE, Thiebaut F, Howell SB (1993) Regulation of HSP60 mRNA  
533 expression in a human ovarian carcinoma cell line. *Cancer Chemother*  
534 *Pharmacol* 32:279–285. <https://doi.org/10.1007/BF00686173>
- 535 31. Knief U, Forstmeier W (2020) Violating the normality assumption may be the  
536 lesser of two evils. bioRxiv 498931. <https://doi.org/10.1101/498931>
- 537 32. Kotov AA, Ishida S, Taylor DJ (2006) A new species in the *Daphnia curvirostris*  
538 (Crustacea: Cladocera) complex from the eastern Palearctic with molecular  
539 phylogenetic evidence for the independent origin of neckteeth. *J Plankton Res*  
540 28:1067–1079. <https://doi.org/10.1093/plankt/fbl041>
- 541 33. Lange B, Kaufmann AP, Ebert D (2015) Genetic, ecological and geographic  
542 covariables explaining host range and specificity of a microsporidian parasite. *J*  
543 *Anim Ecol* 84:1711–1719. <https://doi.org/10.1111/1365-2656.12421>
- 544 34. Latta IV LC, Peacock M, Civitello DJ, et al. (2015) The phenotypic effects of  
545 spontaneous mutations in different environments. *The American Naturalist*  
546 185(2):243–52. <https://doi.org/10.1086/679501>
- 547 35. Lee B-Y, Choi B-S, Kim M-S, et al. (2019) The genome of the freshwater water  
548 flea *Daphnia magna*: a potential use for freshwater molecular ecotoxicology.  
549 *Aquatic Toxicology* 210:69–84. <https://doi.org/10.1016/j.aquatox.2019.02.009>
- 550 36. Liu CP, Fu J, Xu FP, et al. (2015) The role of heat shock proteins in oxidative  
551 stress damage induced by Se deficiency in chicken livers. *Biometals* 28:163–  
552 173. <https://doi.org/10.1007/s10534-014-9812-x>
- 553 37. Lynch M, Ackerman MS, Gout JF, et al. (2016). Genetic drift, selection and the  
554 evolution of the mutation rate. *Nature Reviews Genetics*, 17(11), 704.
- 555 38. Magnoni R, Palmfeldt J, Hansen J, et al. (2014) The HSP60 folding machinery is  
556 crucial for manganese superoxide dismutase folding and function. *Free Radic*  
557 *Res* 48:168–179. <https://doi.org/10.3109/10715762.2013.858147>

- 558 39. Martin J, Horwich AL, Hartl FU (1992) Prevention of protein denaturation under  
559 heat stress by the chaperonin HSP60. *Science* 258:995–998.  
560 <https://doi.org/10.1126/science.1359644>
- 561 40. Mason GA, Carlson KD, Press MO, et al. (2018) HSP90 buffers newly induced  
562 mutations in massively mutated plant lines. *bioRxiv* 355735.  
563 <https://doi.org/10.1101/355735>
- 564 41. Mikulski A, Grzesiuk M, Kloc M, Pijanowska J (2009) Heat Shock Proteins in  
565 *Daphnia* Detected Using Commercial Antibodies: Description and  
566 Responsiveness to Thermal Stress. *Chemoecology* 19:69.  
567 <https://doi.org/10.1007/s00049-009-0010-1>.
- 568 42. Mikulski A, Bernatowicz P, Grzesiuk M, et al. (2011) Differential Levels of Stress  
569 Proteins (HSPs) in Male and Female *Daphnia magna* in Response to Thermal  
570 Stress: A Consequence of Sex-Related Behavioral Differences? *Journal of*  
571 *Chemical Ecology* 37: 670–76. <https://doi.org/10.1007/s10886-011-9969-5>.
- 572 43. Neuhaus-Steinmetz U, Rensing L (1997) Heat shock protein induction by certain  
573 chemical stressors is correlated with their cytotoxicity, lipophilicity and protein-  
574 denaturing capacity. *Toxicology* 123:185–195. [https://doi.org/10.1016/s0300-  
575 483x\(97\)00124-8](https://doi.org/10.1016/s0300-483x(97)00124-8)
- 576 44. Orsini L, Gilbert D, Podicheti R, et al. (2016) *Daphnia magna* transcriptome by  
577 RNA-Seq across 12 environmental stressors. *Scientific Data* 3:160030.  
578 <https://doi.org/10.1038/sdata.2016.30>
- 579 45. Palumbi SR, Barshis DJ, Traylor-Kowles N, Bay RA (2014) Mechanisms of reef  
580 coral resistance to future climate change. *Science* 344:895–898.  
581 <https://doi.org/10.1126/science.1251336>
- 582 46. Pauwels K, Stoks R, Decaestecker E, De Meester L (2007) Evolution of Heat  
583 Shock Protein Expression in a Natural Population of *Daphnia magna*. *The*  
584 *American Naturalist* 170:800–805. <https://doi.org/10.1086/521956>
- 585 47. Picard DJ, Schulte PM (2004) Variation in gene expression in response to stress  
586 in two populations of *Fundulus heteroclitus*. *Comp Biochem Physiol, Part A Mol*  
587 *Integr Physiol* 137:205–216. [https://doi.org/10.1016/s1095-6433\(03\)00292-7](https://doi.org/10.1016/s1095-6433(03)00292-7)
- 588 48. Queitsch C, Sangster TA, Lindquist S (2002) HSP90 as a capacitor of  
589 phenotypic variation. *Nature* 417:618–624. <https://doi.org/10.1038/nature749>
- 590 49. Rieu I, Powers SJ (2009) Real-time quantitative rt-pcr: design, calculations, and  
591 statistics. *The Plant Cell* 21:1031–1033. <https://doi.org/10.1105/tpc.109.066001>

- 592 50. Ritossa F (1962) A new puffing pattern induced by temperature shock and DNP  
593 in *Drosophila*. *Experientia*. <https://doi.org/10.1007/BF02172188>
- 594 51. Rohde RA and Hausfather Z (2020) The Berkeley Earth/Land Ocean  
595 Temperature Record. *Earth System Science Data* 12(4): 3469-3479.  
596 <https://doi.org/10.5194/essd-12-3469-2020>
- 597 52. ohner N, Jarosz DF, Kowalko JE, et al. (2013) Cryptic variation in morphological  
598 evolution: HSP90 as a capacitor for loss of eyes in cavefish. *Science* 342:1372–  
599 1375. <https://doi.org/10.1126/science.1240276>
- 600 53. Rutherford SL, Lindquist S (1998) HSP90 as a capacitor for morphological  
601 evolution. *Nature* 396:336–342. <https://doi.org/10.1038/24550>
- 602 54. Sabater-Muñoz B, Prats-Escriche M, Montagud-Martínez R, et al. (2015) Fitness  
603 trade-offs determine the role of the molecular chaperonin GroEL in buffering  
604 mutations. *Mol Biol Evol* 32:2681–2693. <https://doi.org/10.1093/molbev/msv144>
- 605 55. Schaack S (2008) *Daphnia* comes of age: an ecological model in the genomic  
606 era. *Molecular Ecology* 17:1634–1635. [https://doi.org/10.1111/j.1365-  
607 294X.2008.03698.x](https://doi.org/10.1111/j.1365-294X.2008.03698.x)
- 608 56. Schaack S, Ho EKH, Macrae F (2020) Disentangling the intertwined roles of  
609 mutation, selection and drift in the mitochondrial genome. *Philosophical  
610 Transactions of the Royal Society B: Biological Sciences* 375:20190173.  
611 <https://doi.org/10.1098/rstb.2019.0173>
- 612 57. Schopf FH, Biebl MM, Buchner J (2017) The HSP90 chaperone machinery.  
613 *Nature Reviews Molecular Cell Biology* 18:345–360.  
614 <https://doi.org/10.1038/nrm.2017.20>
- 615 58. Shaw JR, Pfrender ME, Eads BD, et al. (2008) *Daphnia* as an emerging model  
616 for toxicological genomics. *Advances in Experimental Biology*. Elsevier, pp 165–  
617 328 [https://doi.org/10.1016/S1872-2423\(08\)00005-7](https://doi.org/10.1016/S1872-2423(08)00005-7)
- 618 59. Singh MP, Reddy MMK, Mathur N, et al. (2009) Induction of HSP70, HSP60,  
619 HSP83 and HSP26 and oxidative stress markers in benzene, toluene and  
620 xylene exposed *Drosophila melanogaster*: role of ROS generation. *Toxicology  
621 and Applied Pharmacology* 235:226–243.  
622 <https://doi.org/10.1016/j.taap.2008.12.002>
- 623 60. Steinberg CEW, Ouerghemmi N, Herrmann S, et al. (2010) Stress by poor food  
624 quality and exposure to humic substances: *Daphnia magna* responds with  
625 oxidative stress, lifespan extension, but reduced offspring numbers.  
626 *Hydrobiologia* 652:223–236. <https://doi.org/10.1007/s10750-010-0334-4>

- 627 61. Swings T, Van den Bergh B, Wuyts S, et al. (2017) Adaptive tuning of mutation  
628 rates allows fast response to lethal stress in *Escherichia coli*. eLife 6:e22939.  
629 <https://doi.org/10.7554/eLife.22939>
- 630 62. Taipale M, Jarosz DF, Lindquist S (2010) HSP90 at the hub of protein  
631 homeostasis: emerging mechanistic insights. Nature Reviews Molecular Cell  
632 Biology 11:515–528. <https://doi.org/10.1038/nrm2918>
- 633 63. Tissières A, Mitchell HK, Tracy UM (1974) Protein synthesis in salivary glands of  
634 *Drosophila melanogaster*: relation to chromosome puffs. Journal of Molecular  
635 Biology 84:389–398. [https://doi.org/10.1016/0022-2836\(74\)90447-1](https://doi.org/10.1016/0022-2836(74)90447-1)
- 636 64. Tomanek L, & Somero GN (2002) Interspecific-and acclimation-induced variation  
637 in levels of heat-shock proteins 70 (HSP70) and 90 (HSP90) and heat-shock  
638 transcription factor-1 (HSF1) in congeneric marine snails (genus *Tegula*):  
639 implications for regulation of HSP gene expression. Journal of Experimental  
640 Biology 205(5):677-685.
- 641 65. Vabulas RM, Raychaudhuri S, Hayer-Hartl M, Hartl FU (2010) Protein folding in  
642 the cytoplasm and the heat shock response. Cold Spring Harb Perspect Biol  
643 2:12. <https://doi.org/10.1101/cshperspect.a004390>
- 644 66. Xie F, Xiao P, Chen D, et al. (2012) miRDeepFinder: a miRNA analysis tool for  
645 deep sequencing of plant small RNAs. Plant Mol Biol. 80:75-84  
646 <https://doi.org/10.1007/s11103-012-9885-2>
- 647 67. Yampolsky LY, Zeng E, Lopez J, et al. (2014) Functional genomics of  
648 acclimation and adaptation in response to thermal stress in *Daphnia*. BMC  
649 Genomics 15:859. <https://doi.org/10.1186/1471-2164-15-859>
- 650 68. Zabinsky RA, Mares J, She R, et al. (2019a) A stress response that allows  
651 highly mutated eukaryotic cells to survive and proliferate. bioRxiv 515460.  
652 <https://doi.org/10.1101/515460>
- 653 69. Zabinsky RA, Mason GA, Queitsch C, Jarosz DF (2019b) It's not magic - HSP90  
654 and its effects on genetic and epigenetic variation. Semin Cell Dev Biol 88:21–  
655 35. <https://doi.org/10.1016/j.semcdb.2018.05.015>
- 656  
657  
658  
659

660 **Author Contributions**

661 HS conceived of the study, carried out lab work, performed data analyses, and  
662 collaboratively wrote and edited the manuscript; JC assisted with experimental design,  
663 helped with lab work, data analysis, providing crucial comments and input to develop  
664 and improve the manuscript; EKHH extracted sequence data for primer design and  
665 analysis and performed alignments; SS supplied the lineages used in the study and  
666 helped/supervised the experimental design, live animal exposures, molecular assays,  
667 data analysis and interpretation, and writing and editing manuscript. All authors gave  
668 final approval for publication and agree to be held accountable for the work performed  
669 therein.

670

671 **Data Availability Statement**

672 All raw and transformed data used in this study are in Supplemental Tables S6, S7, S8,  
673 and S9. All R code (SuppFile1) and sequence data (SuppFile2) have been uploaded as  
674 a Supplemental Files.

675

676 **Competing Interests**

677 The authors declare no competing interests.

678

679

680

681 **Supplemental Materials**

682 **Supplemental Data Files**

683 SuppFile1\_All\_R\_Code.txt

684 SuppFile2\_Zipped\_SequenceData.zip

685 **Supplemental Tables**

686 Supplemental Tables S0-S9 are available, each on a single sheet, in a .xls workbook  
687 (SupplementalTables\_122720.xlsx).

688

689 **Table S0.** Primers used for RT-qPCR with *Daphnia magna* cDNA extracts in this study.

690 **Table S1a, b, c.** Sample collection data for *Daphnia magna* and sample sizes for in this  
691 study.

692 **Table S2.** Complete multifactor ANOVA table conducted using the entire dataset of  
693 expression level data for *Daphnia magna* across genotypes, heat shock treatments,  
694 with and without mutation accumulation, including main and interaction effects. All R  
695 code is available in a supplemental file.

696 **Table S3.** Partitioned ANOVAs performed using HSP90 expression levels based on  
697 log<sub>2</sub>(NRQ) data found in Table S8.

698 **Table S4.** Partitioned ANOVAs performed using HSP60 expression levels based on  
699 log<sub>2</sub>(NRQ) data found in Table S9.

700 **Table S5.** Partitioned ANOVAs performed using HSP90 and HSP60 expression levels  
701 based on log<sub>2</sub>(NRQ) data for only Israel lines to test for genotype effects.

702 **Table S6.** HSP90 expression levels in *Daphnia magna* before log transformation (used  
703 in Figure 2 and Figure 3).

704 **Table S7.** HSP60 expression levels in *Daphnia magna* before log transformation (used  
705 in Figure 2 and Figure 3).

706 **Table S8.** Calculations of the log<sub>2</sub>(NRQ) for HSP90 across all available genotypes and  
707 biological replicates used for all statistics unless otherwise specified.

708 **Table S9.** Calculations of the log<sub>2</sub>(NRQ) for HSP60 across all available genotypes and  
709 biological replicates used for all statistics unless otherwise specified.

710

711 **Supplemental Figures**

712 (see below, and SuppFig1.jpg and SuppFig2.jpg)

713 **Supplemental Figures**

714

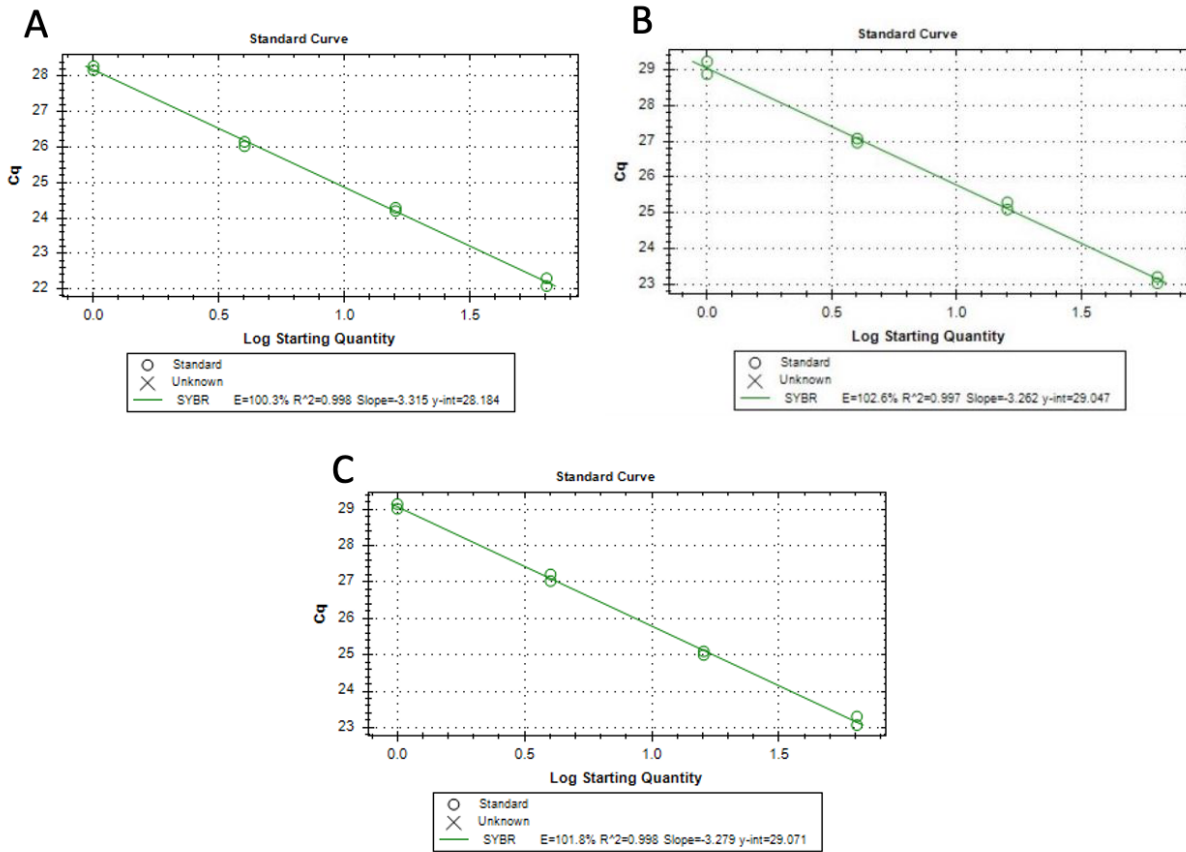

715

716 **Supplemental Figure 1: Amplification Curves of Dilution Series for qPCR Primers.**

717 Each standard curve was made by using the standard qPCR reaction mix and  
718 thermocycler program with two replicates of a dilution series of 1, 1/4, 1/16, and 1/64 of  
719 the original cDNA concentration. A) Standard amplification curve of HSP90 with an  
720 efficiency = 100.3%, B) standard amplification curve of HSP60 with efficiency = 102.6%,  
721 C) standard amplification curve of UBC with efficiency = 101.8%.

722



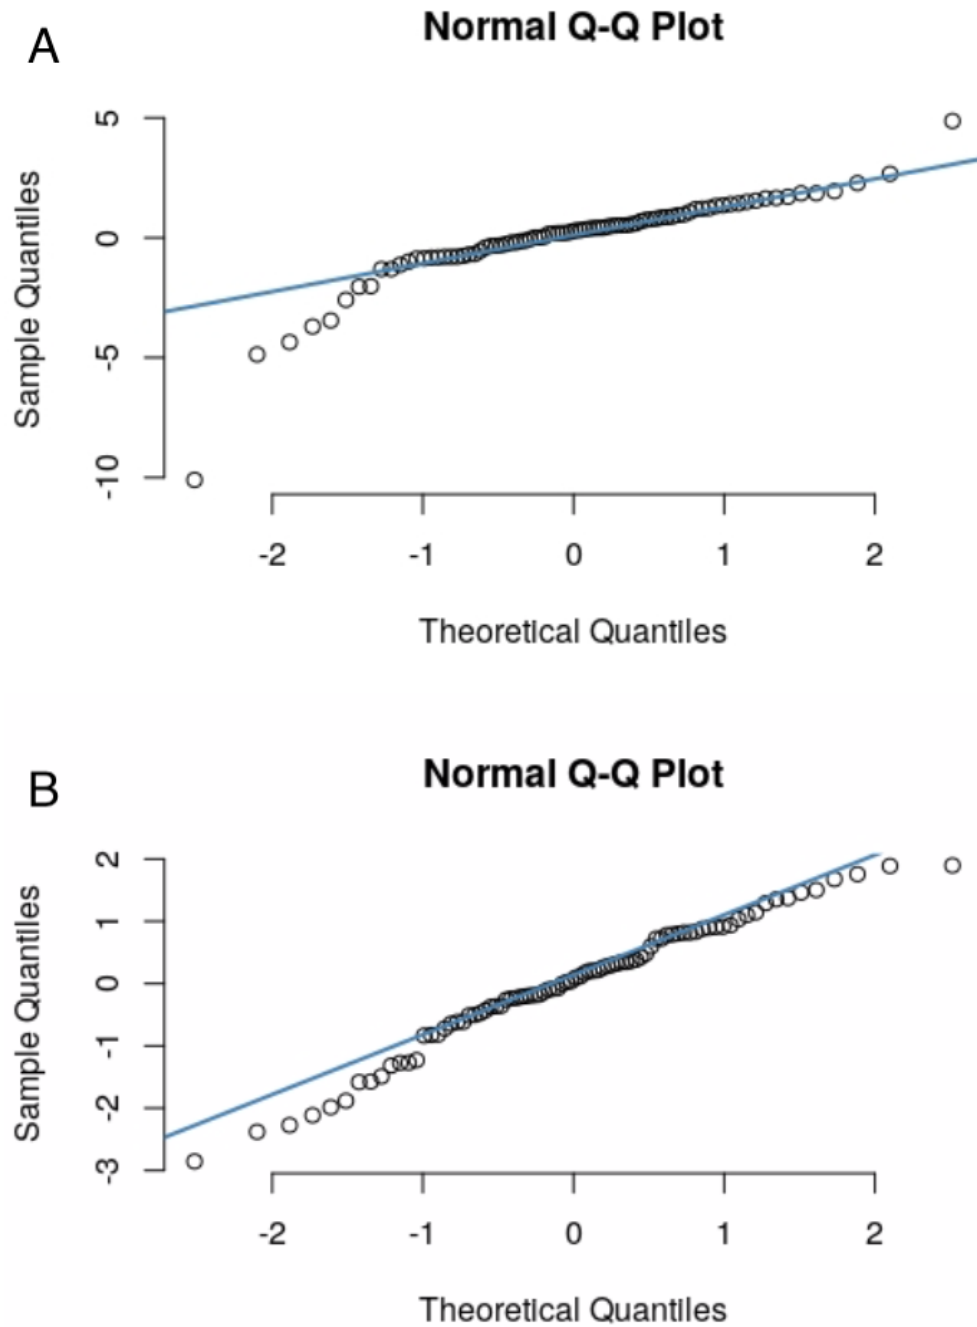

723  
724  
725  
726  
727  
728  
729  
730  
731

**Supplemental Figure 2. Q-Q plots of HSP90 mRNA expression levels (A) and HSP60 mRNA expression levels (B).** Q-Q plots were made from residuals of a multiple linear regression model using all samples for both genes independently.
